# Supplementary material for: Child Behavior Checklist—Mania Scale (CBCL-MS): Development and Evaluation of a Population-Based Screening Scale for Bipolar Disorder
Source: PubMed Central journal article supplement (PMC3743889; doi:10.1371/journal.pone.0069459), 2013-08-14

# Child Behaviour Checklist – Mania Scale (CBCL-MS)

Below is a list of items that describe children and youths. For each item that describes your child **now or within the past 6 months**, please circle the **2** if the item is **very true or often true** of your child. Circle **1** if the item is **somewhat or sometimes true** of your child. Circle **0** if the item is **not true** of your child. Please answer all items as well as you can, even if some do not seem to apply to your child.

**0=not true    1=somewhat or sometimes true    2= very true or often true**

- |          |          |          |                                                 |
|----------|----------|----------|-------------------------------------------------|
| <b>0</b> | <b>1</b> | <b>2</b> | <b>Can't sit still, restless or hyperactive</b> |
| <b>0</b> | <b>1</b> | <b>2</b> | <b>Feels others are out to get him/her</b>      |
| <b>0</b> | <b>1</b> | <b>2</b> | <b>Gets in many fights</b>                      |
| <b>0</b> | <b>1</b> | <b>2</b> | <b>Hears sound or voices that aren't there</b>  |
| <b>0</b> | <b>1</b> | <b>2</b> | <b>Impulsive or acts without thinking</b>       |
| <b>0</b> | <b>1</b> | <b>2</b> | <b>Plays with own sex parts in public</b>       |
| <b>0</b> | <b>1</b> | <b>2</b> | <b>Plays with own sex parts too much</b>        |
| <b>0</b> | <b>1</b> | <b>2</b> | <b>Sees things that aren't there</b>            |
| <b>0</b> | <b>1</b> | <b>2</b> | <b>Showing off or clowning</b>                  |
| <b>0</b> | <b>1</b> | <b>2</b> | <b>Sleeps less than most kids</b>               |
| <b>0</b> | <b>1</b> | <b>2</b> | <b>Inattentive or easily distracted</b>         |
| <b>0</b> | <b>1</b> | <b>2</b> | <b>Strange ideas</b>                            |
| <b>0</b> | <b>1</b> | <b>2</b> | <b>Sudden changes in mood or feelings</b>       |
| <b>0</b> | <b>1</b> | <b>2</b> | <b>Suspicious</b>                               |
| <b>0</b> | <b>1</b> | <b>2</b> | <b>Talks too much</b>                           |
| <b>0</b> | <b>1</b> | <b>2</b> | <b>Teases a lot</b>                             |
| <b>0</b> | <b>1</b> | <b>2</b> | <b>Thinks about sex too much</b>                |
| <b>0</b> | <b>1</b> | <b>2</b> | <b>Trouble sleeping</b>                         |
| <b>0</b> | <b>1</b> | <b>2</b> | <b>Unusually loud</b>                           |

Items listed correspond in ascending order to items 10, 34,37,40,41,59,60,70,74,76,78,85,87,89,93,94,96,100,104 of the CBCL (6-18) by Achenbach TM, Rescorla LA. Manual for the ASEBA School-Age Forms & Profiles. Research Center for Children, Youth and Families. University of Vermont, Burlington, VT: 2001.

# CBCL-MS Scoring Sheet

## CBCL-MS Raw Scores

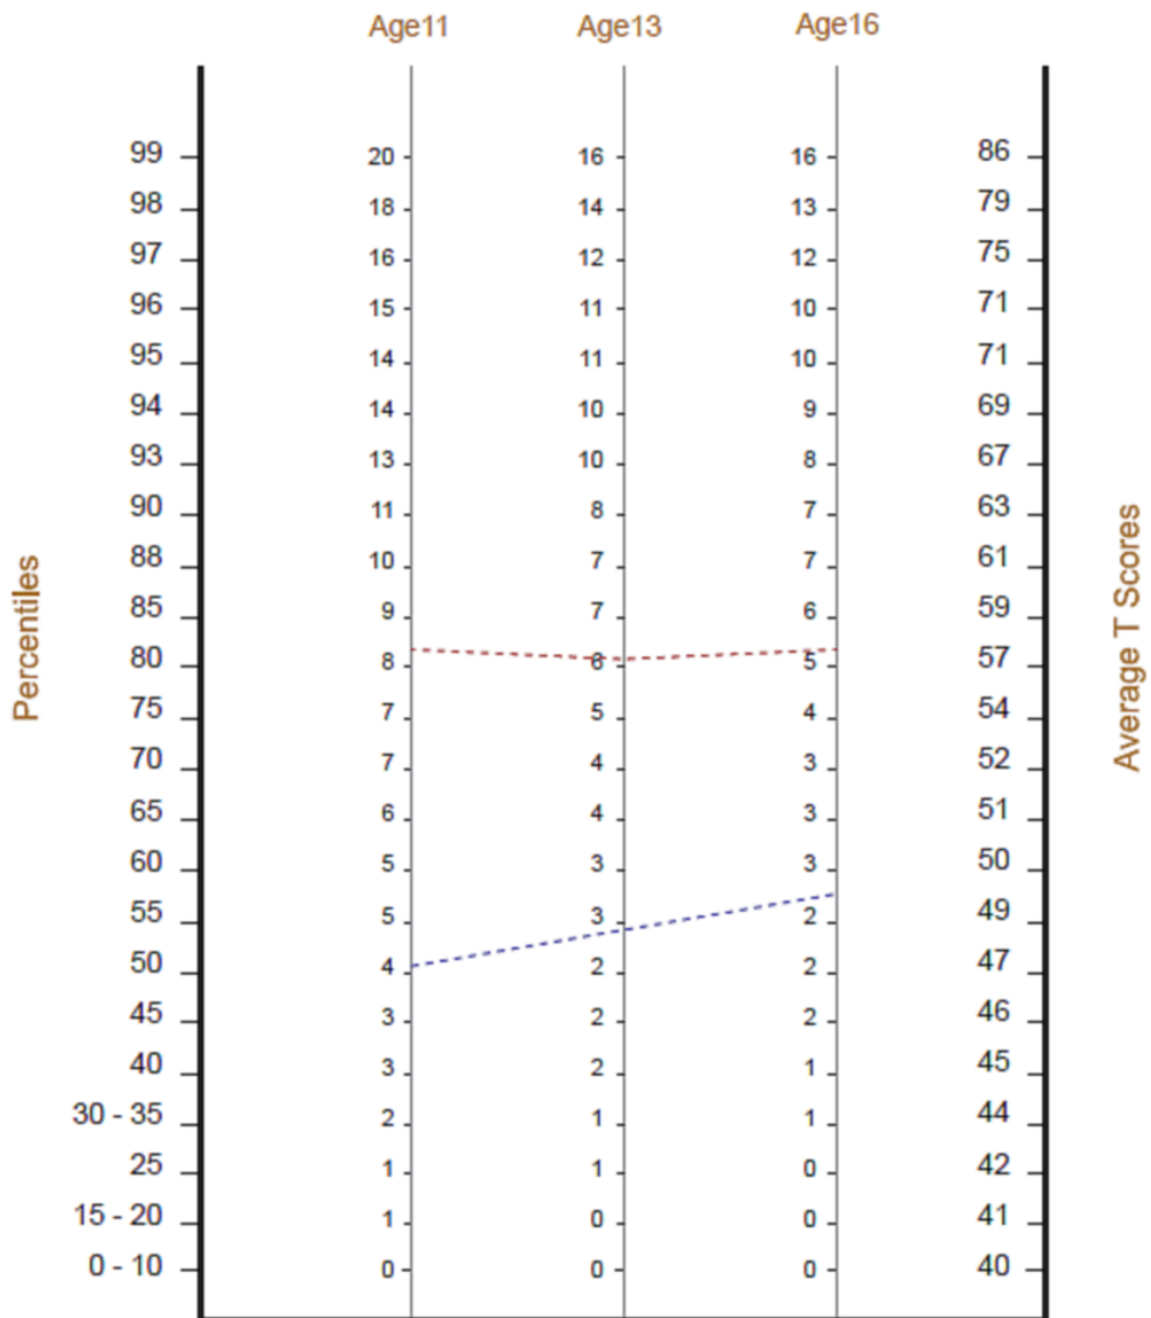

Average score for healthy individuals

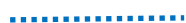

Threshold for mania cases

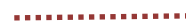

Supplement: pone.0069459.s006.pdf [file pone.0069459.s006.pdf]
